# Supplementary material
Source: HighWire-hosted journal article supplement (https://erj.ersjournals.com/content/52/6/1800610)
Supplement: inline-supplementary-material-2 [file inline-supplementary-material-2.pdf]

## Supplement 2

### Pan-European Lung Cancer Dataset

| Basic patient features         |                                                             |                                                                                                                                                                                                                                                                                                                                                                                                                                                                                                                                                                                                                                                                                                                                                                                                                                                                                                                                                                                                                           |
|--------------------------------|-------------------------------------------------------------|---------------------------------------------------------------------------------------------------------------------------------------------------------------------------------------------------------------------------------------------------------------------------------------------------------------------------------------------------------------------------------------------------------------------------------------------------------------------------------------------------------------------------------------------------------------------------------------------------------------------------------------------------------------------------------------------------------------------------------------------------------------------------------------------------------------------------------------------------------------------------------------------------------------------------------------------------------------------------------------------------------------------------|
| Data item                      | Definition                                                  | Detailed definition                                                                                                                                                                                                                                                                                                                                                                                                                                                                                                                                                                                                                                                                                                                                                                                                                                                                                                                                                                                                       |
| Date of birth                  | dd/mm/yyyy                                                  |                                                                                                                                                                                                                                                                                                                                                                                                                                                                                                                                                                                                                                                                                                                                                                                                                                                                                                                                                                                                                           |
| Sex                            | Male or female                                              | 1=male<br>2=female<br>999=undisclosed/unknown                                                                                                                                                                                                                                                                                                                                                                                                                                                                                                                                                                                                                                                                                                                                                                                                                                                                                                                                                                             |
| Country of registration        | ISO-3166                                                    | 2 letter code                                                                                                                                                                                                                                                                                                                                                                                                                                                                                                                                                                                                                                                                                                                                                                                                                                                                                                                                                                                                             |
| Education level                | Numerical value (ICHOM)                                     | Indicate highest level of education completed<br>0=None<br>1=Primary<br>2=Secondary<br>3=Tertiary (college, university)<br>999=Don't know                                                                                                                                                                                                                                                                                                                                                                                                                                                                                                                                                                                                                                                                                                                                                                                                                                                                                 |
| Date of referral               | dd/mm/yyyy                                                  | Date on which referral made with respect to potential lung cancer.<br><br>This could include, self-referral, primary to secondary care, within secondary care<br><br>Option for missing/unknown.                                                                                                                                                                                                                                                                                                                                                                                                                                                                                                                                                                                                                                                                                                                                                                                                                          |
| Date of diagnosis              | dd/mm/yyyy                                                  | Date the <b>first</b> histopathology/cytology sample was taken which confirmed malignancy,<br><br>If date of histopathology sample not available then index date based on following criteria in descending order. (as per IARC)<br><b>1.</b> Date of first histological or cytological confirmation of this malignancy (with the exception of histology or cytology at autopsy). This date should be, in the following order:<br>a) date when the specimen was taken (biopsy)<br>b) date of receipt by pathologist<br>c) date of the pathology report<br><b>2.</b> Date of admission to hospital because of this malignancy.<br><b>3.</b> When evaluated at an outpatient clinic only: date of first consultation at the out-patient clinic because of this malignancy.<br><b>4.</b> Date of diagnosis other than 1,2 or 3.<br><b>5.</b> Date of death, if no information is available other than the fact that the patient died of a malignancy.<br><b>6.</b> Date of death, if the malignancy is discovered at autopsy. |
| Date of final pathology report | dd/mm/yyyy                                                  | Date of <b>final</b> pathology report to include molecular analysis where appropriate<br><br>Option for missing/unknown.                                                                                                                                                                                                                                                                                                                                                                                                                                                                                                                                                                                                                                                                                                                                                                                                                                                                                                  |
| Mode of presentation           | How was lung cancer first suspected?<br><br>Numerical value | 0=screening<br>1=symptoms<br>2=incidental finding<br>3=other (free text box to specify)<br>999=don't know                                                                                                                                                                                                                                                                                                                                                                                                                                                                                                                                                                                                                                                                                                                                                                                                                                                                                                                 |

|                                                                         |                                                                                     |                                                                                                                                                                                                                                                                                                                                                                                                         |
|-------------------------------------------------------------------------|-------------------------------------------------------------------------------------|---------------------------------------------------------------------------------------------------------------------------------------------------------------------------------------------------------------------------------------------------------------------------------------------------------------------------------------------------------------------------------------------------------|
| <b>Basis of diagnosis</b>                                               | Numerical value<br><b>(ICHOM)</b>                                                   | 1=Clinical<br>2=Histology<br>3=Cytology<br>999=unknown                                                                                                                                                                                                                                                                                                                                                  |
|                                                                         | Clinical                                                                            | Diagnosis made before death with or without diagnostic techniques (e.g. X-rays, endoscopy, imaging, ultrasound, exploratory surgery) <b>but</b> without a tissue diagnosis                                                                                                                                                                                                                              |
|                                                                         | Histology                                                                           | Histological examination of tissue from the primary tumour or metastasis, including all cutting and bone marrow biopsies. Also includes autopsy specimens.                                                                                                                                                                                                                                              |
|                                                                         | Cytology                                                                            | Examination of cells whether from a primary or secondary site, including fluids aspirated using endoscopes or needles. Also including microscopic examination of peripheral blood films and trephine bone marrow aspirates                                                                                                                                                                              |
|                                                                         |                                                                                     |                                                                                                                                                                                                                                                                                                                                                                                                         |
| <b>Tumour details</b>                                                   |                                                                                     |                                                                                                                                                                                                                                                                                                                                                                                                         |
| <b>Data item</b>                                                        | <b>Definition</b>                                                                   | <b>Detailed definition</b>                                                                                                                                                                                                                                                                                                                                                                              |
| <b>Histology</b>                                                        | System used                                                                         | International Classification Diseases -Oncology-3 <sup>rd</sup> edition (ICD-O-3 <sup>rd</sup> edition) ( <a href="#">covers the entire 2015 World Health Organization (WHO) Classification of Tumours of the Lung</a> )<br>Systematized Nomenclature of Medicine (SNOMED)<br><br>Based on which system is used, a list of possible options will appear, and the correct histology field can be ticked. |
|                                                                         | <b>If no recognised system used then drop down menu appears with a limited list</b> |                                                                                                                                                                                                                                                                                                                                                                                                         |
|                                                                         | 1                                                                                   | Small cell carcinoma                                                                                                                                                                                                                                                                                                                                                                                    |
|                                                                         | 2                                                                                   | Non-small cell carcinoma (NSCLC) NOS                                                                                                                                                                                                                                                                                                                                                                    |
|                                                                         | 3                                                                                   | Squamous cell carcinoma                                                                                                                                                                                                                                                                                                                                                                                 |
|                                                                         | 4                                                                                   | Adenocarcinoma                                                                                                                                                                                                                                                                                                                                                                                          |
|                                                                         | 5                                                                                   | Large cell neuroendocrine carcinoma                                                                                                                                                                                                                                                                                                                                                                     |
|                                                                         | 6                                                                                   | Carcinoid-typical                                                                                                                                                                                                                                                                                                                                                                                       |
|                                                                         | 7                                                                                   | Carcinoid-atypical                                                                                                                                                                                                                                                                                                                                                                                      |
|                                                                         | 8                                                                                   | Adenocarcinoma in situ                                                                                                                                                                                                                                                                                                                                                                                  |
|                                                                         | 9                                                                                   | Spindle/pleiomorphic/giant cell NSCLC                                                                                                                                                                                                                                                                                                                                                                   |
|                                                                         | 10                                                                                  | Other (free text box appears)                                                                                                                                                                                                                                                                                                                                                                           |
|                                                                         | 999                                                                                 | Unknown                                                                                                                                                                                                                                                                                                                                                                                                 |
| <b>Molecular analysis*</b>                                              | Was this performed?                                                                 | 0=No<br>1=Yes<br>999=don't know                                                                                                                                                                                                                                                                                                                                                                         |
| <b>Further questions only relevant if molecular analysis performed.</b> | <b>EGFR mutation (ICHOM)</b><br>Numerical value                                     | Indicate presence of EGFR activating mutation<br>0=No<br>1=Yes<br>2=Failed analysis<br>999=don't know                                                                                                                                                                                                                                                                                                   |
|                                                                         | <b>If activating mutation found, on which exon?</b>                                 | 0=not relevant<br>1=exon 18<br>2=exon 19<br>3=exon 21<br>999=don't know                                                                                                                                                                                                                                                                                                                                 |
|                                                                         | <b>EGFR mutation T790M</b>                                                          | Indicate presence of EGFR mutation of resistance<br>0=No                                                                                                                                                                                                                                                                                                                                                |

|  |                                                     |                                                                                                      |
|--|-----------------------------------------------------|------------------------------------------------------------------------------------------------------|
|  |                                                     | 1=Yes<br>2=Failed analysis<br>999=don't know                                                         |
|  | ALK translocation<br><br>(ICHOM)<br>Numerical value | Indicate presence of ALK translocation<br>0=No<br>1=Yes<br>2=failed analysis<br>999=don't know       |
|  | Ros 1                                               | Indicate presence of Ros1 translocation<br>0=No<br>1=Yes<br>2=failed analysis<br>999=don't know      |
|  | BRAF                                                | Indicate presence of BRAF mutation<br>0=No<br>1=Yes<br>2=failed analysis<br>999=don't know           |
|  | PD-L1 status                                        | Indicate PD-L1 status<br>0=Not expressed<br>1=Some expression<br>2=failed analysis<br>999=don't know |
|  | PD-L1 percent expression                            | 0=not applicable (ie 0 above)<br>1=<1<br>2=1-9.9%<br>3=10-49%<br>4=>50%                              |
|  | RET                                                 | Indicate presence of RET translocation<br>0=No<br>1=Yes<br>2=failed analysis<br>999=don't know       |
|  | MET                                                 | Indicate presence of MET amplification<br>0=No<br>1=Yes<br>2=failed analysis<br>999=don't know       |
|  | MET exon 14                                         | Indicate presence of MET mutation exon 14<br>0=No<br>1=Yes<br>2=failed analysis<br>999=don't know    |
|  | HER 2                                               | Indicate presence of HER2 mutation<br>0=No                                                           |

|                                                          |                                                                                               |                                                                                                                                                                                                                                                                                          |
|----------------------------------------------------------|-----------------------------------------------------------------------------------------------|------------------------------------------------------------------------------------------------------------------------------------------------------------------------------------------------------------------------------------------------------------------------------------------|
|                                                          |                                                                                               | 1=Yes<br>2=failed analysis<br>999=don't know                                                                                                                                                                                                                                             |
| * Annual updates expected as molecular medicine develops |                                                                                               |                                                                                                                                                                                                                                                                                          |
| <b>Stage</b>                                             | <b>Final pre-treatment clinical stage</b>                                                     |                                                                                                                                                                                                                                                                                          |
| <b>Basis of stage</b>                                    | What method was used to decide the final pre-treatment clinical stage?<br><br>Numerical value | 0=imaging only<br>1=imaging AND non-surgical pathology samples<br>2=imaging and surgical biopsies (mediastinoscopy, VATS procedure)<br>999=Don't know<br><u>Definition of non-surgical samples;</u><br>EBUS, EUS, percutaneous lung or pleural biopsy, pleural aspiration, bronchoscopy. |
| <b>Investigations performed?</b>                         | CT scan<br><br>Numerical value                                                                | 0=No<br>1=Yes<br>999=Don't know                                                                                                                                                                                                                                                          |
|                                                          | PET-CT                                                                                        | 0=No<br>1=Yes<br>999=Don't know                                                                                                                                                                                                                                                          |
|                                                          | Bronchoscopy                                                                                  | 0=No<br>1=Yes<br>999=Don't know                                                                                                                                                                                                                                                          |
|                                                          | EBUS                                                                                          | 0=No<br>1=Yes<br>999=Don't know                                                                                                                                                                                                                                                          |
|                                                          | EUS                                                                                           | 0=No<br>1=Yes<br>999=Don't know                                                                                                                                                                                                                                                          |
|                                                          | Mediastinoscopy                                                                               | 0=No<br>1=Yes<br>999=Don't know                                                                                                                                                                                                                                                          |
|                                                          | Histopathology or cytology from node outside chest                                            | 0=No<br>1=Yes<br>999=Don't know                                                                                                                                                                                                                                                          |
|                                                          | Sampling of pleura or pleural fluid aspiration (medical)                                      | 0=No<br>1=Yes<br>999=Don't know                                                                                                                                                                                                                                                          |
|                                                          | VATS thoracoscopy                                                                             | 0=No<br>1=Yes<br>999=Don't know                                                                                                                                                                                                                                                          |
|                                                          | Imaging of metastasis (e.g.; CT/MRI brain, MRI spine, MRI adrenal etc)                        | 0=No<br>1=Yes<br>999=Don't know                                                                                                                                                                                                                                                          |
|                                                          | Histopathology of metastasis (eg liver biopsy)                                                | 0=No<br>1=Yes<br>999=Don't know                                                                                                                                                                                                                                                          |
|                                                          | Exploratory open thoracic                                                                     | 0=No                                                                                                                                                                                                                                                                                     |

|                                     |                                     |                                                                                                                                                                                                                                                                                                                                           |
|-------------------------------------|-------------------------------------|-------------------------------------------------------------------------------------------------------------------------------------------------------------------------------------------------------------------------------------------------------------------------------------------------------------------------------------------|
|                                     | surgery                             | 1=Yes<br>999=Don't know                                                                                                                                                                                                                                                                                                                   |
| <b>Tumour size</b>                  | Numerical value                     | The longest single direction size (cm to one decimal point, e.g.3.2)                                                                                                                                                                                                                                                                      |
| <b>Staging system</b>               | Which staging system has been used? | UICC 7th or 8th<br><br>Based on this answer; drop down menu appears for T, N and M stage.                                                                                                                                                                                                                                                 |
| <b>Tumour stage</b>                 | Mixed value                         | UICC Version 7; 1a through to 4<br>UICC Version 8; 1mi through to 4<br><br>999=Unknown/X                                                                                                                                                                                                                                                  |
| <b>Nodal stage</b>                  | Mixed value                         | Version 7 or 8; 0 to 3<br><br>999=unknown                                                                                                                                                                                                                                                                                                 |
| <b>Extent of N1 disease</b>         | Numerical value                     | 0=Not applicable<br>1=Single station N1 disease<br>2=Multi-station N1 disease                                                                                                                                                                                                                                                             |
| <b>Extent of N2 disease</b>         | Numerical value                     | <b>0=Not applicable</b><br><b>1= microscopic N2 node found at final pathological (post-operative) specimen,</b><br><b>2= Single station N2 node without N1 disease ('skip' lesion)</b><br><b>3= Single station N2 node with N1 involvement</b><br><b>4= Multi-station N2 disease</b><br><b>5= Bulky or fixed multi-station N2 disease</b> |
| <b>Metastasis stage</b>             | Mixed value                         | Version 7: 0 through to 1b<br>Version 8; 0 through to 1c<br>999=unknown/X                                                                                                                                                                                                                                                                 |
| <b>Number of metastatic lesions</b> | Numerical value                     | 0=no metastatic spread (ie M0 above)<br>1, 2, 3 onwards<br>999=don't know                                                                                                                                                                                                                                                                 |
| <b>Site of metastases</b>           | Liver<br><br>Numerical value        | 0=no<br>1=Yes<br>If yes, specify number of metastatic lesions 1, 2, 3 onwards<br>999=don't know                                                                                                                                                                                                                                           |
|                                     | Brain                               | 0=no<br>1=Yes<br>If yes, number of metastatic lesions 1, 2, 3 onwards<br>999=don't know                                                                                                                                                                                                                                                   |
|                                     | Adrenal                             | 0=no<br>1=Yes<br>If yes, specify number of metastatic lesions 1, 2, 3 onwards<br>999=don't know                                                                                                                                                                                                                                           |
|                                     | Bone                                | 0=no<br>1=Yes<br>If yes, specify number of metastatic lesions 1, 2, 3 onwards<br>999=don't know                                                                                                                                                                                                                                           |
|                                     | Other                               | Free text box to confirm site of spread                                                                                                                                                                                                                                                                                                   |

| Extended patient features                                         |                                                                                                                                      |                                                                                                                                                                                                                                                                                                                                                                                                                                                                                                                                                                     |
|-------------------------------------------------------------------|--------------------------------------------------------------------------------------------------------------------------------------|---------------------------------------------------------------------------------------------------------------------------------------------------------------------------------------------------------------------------------------------------------------------------------------------------------------------------------------------------------------------------------------------------------------------------------------------------------------------------------------------------------------------------------------------------------------------|
| Data item                                                         | Definition                                                                                                                           | Detailed definition                                                                                                                                                                                                                                                                                                                                                                                                                                                                                                                                                 |
| Performance status<br>(final pre-treatment)                       | ECOG (WHO)                                                                                                                           | Numerical value<br>0-4<br>999=unknown                                                                                                                                                                                                                                                                                                                                                                                                                                                                                                                               |
|                                                                   | 0                                                                                                                                    | Able to carry out all normal activity without restriction                                                                                                                                                                                                                                                                                                                                                                                                                                                                                                           |
|                                                                   | 1                                                                                                                                    | Restricted in physically strenuous activity, but able to walk and do light work                                                                                                                                                                                                                                                                                                                                                                                                                                                                                     |
|                                                                   | 2                                                                                                                                    | Able to walk and capable of all self-care, but unable to carry out any work. Up and about more than 50% of waking hours                                                                                                                                                                                                                                                                                                                                                                                                                                             |
|                                                                   | 3                                                                                                                                    | Capable of only limited self-care, confined to bed or chair more than 50% of waking hours                                                                                                                                                                                                                                                                                                                                                                                                                                                                           |
|                                                                   | 4                                                                                                                                    | Completely disabled. Cannot carry on any self-care. Totally confined to bed or chair                                                                                                                                                                                                                                                                                                                                                                                                                                                                                |
|                                                                   | 999                                                                                                                                  | Unknown/not recorded                                                                                                                                                                                                                                                                                                                                                                                                                                                                                                                                                |
| Smoking status                                                    | Numerical code<br><br>(ICHOM)                                                                                                        | 1=never smoker (<100 cigarettes ever)<br>2=ex-smoker (stopped at least 1 year before inclusion, ie diagnosis)<br>3=current smoker<br>999=don't know                                                                                                                                                                                                                                                                                                                                                                                                                 |
| Smoking pack years                                                | Numerical value                                                                                                                      | Simply the number of pack years smoked, regardless of ex or current smoker,<br>Eg 20, 40, etc<br>999=don't know                                                                                                                                                                                                                                                                                                                                                                                                                                                     |
| Comorbidity at baseline<br>From medical consultation with patient | ICHOM modified Self-administered Comorbidity Questionnaire (SCQ; Sangha et al 2003)<br><br>Drop down menu; multiple options possible | Have you been told by a doctor that you have any of the following:<br>0=I have no other diseases<br>1=Heart disease (eg, angina, heart attack or heart failure)<br>2=High blood pressure<br>3=Leg pain when walking due to poor circulation<br>4=Lung disease (eg, asthma, chronic bronchitis, COPD, or emphysema)<br>5=Diabetes<br>6=Kidney disease<br>7=Liver disease<br>8=Problems caused by stroke<br>9=Disease of the nervous system (eg, Parkinson disease, multiple sclerosis)<br>10=other cancer (within the last 5 years)<br>11=Depression<br>12=Arthritis |
| Weight                                                            | Numerical value                                                                                                                      | In kg.<br>999=don't know                                                                                                                                                                                                                                                                                                                                                                                                                                                                                                                                            |
| Height                                                            | Numerical value                                                                                                                      | In m<br>999=don't know                                                                                                                                                                                                                                                                                                                                                                                                                                                                                                                                              |
| Lung function<br>(at baseline)                                    | Numerical value<br>(ICHOM)                                                                                                           | Observed FEV <sub>1</sub> (L) (e.g. 1.35)<br>999=don't know                                                                                                                                                                                                                                                                                                                                                                                                                                                                                                         |
|                                                                   | Numerical value<br>(ICHOM)                                                                                                           | Percent predicted FEV <sub>1</sub> (e.g. 56, would represent 56% predicted)<br>999=don't know                                                                                                                                                                                                                                                                                                                                                                                                                                                                       |
|                                                                   | Numerical value                                                                                                                      | Observed FVC (L) (e.g.. 2.3)<br>999=don't know                                                                                                                                                                                                                                                                                                                                                                                                                                                                                                                      |
|                                                                   | Numerical value                                                                                                                      | Percent predicted transfer factor (KCO) (e.g. 85 would represent 85% predicted)                                                                                                                                                                                                                                                                                                                                                                                                                                                                                     |

|                                                                                   |                        |                                                                                                                                                                                                                |
|-----------------------------------------------------------------------------------|------------------------|----------------------------------------------------------------------------------------------------------------------------------------------------------------------------------------------------------------|
|                                                                                   |                        | Numerical value<br>999=don't know                                                                                                                                                                              |
| <b>Quality of Life</b>                                                            |                        |                                                                                                                                                                                                                |
| At diagnosis                                                                      | EORTC QLQ-C30          | Score (maximum value 126)                                                                                                                                                                                      |
| At end of 1 <sup>st</sup> line treatment                                          | EORTC QLQ-C30          | Score (maximum value 126)                                                                                                                                                                                      |
| At 6 months post diagnosis                                                        | EORTC QLQ-C30          | Score (maximum value 126)                                                                                                                                                                                      |
|                                                                                   |                        |                                                                                                                                                                                                                |
| <b>Lung cancer outcomes</b>                                                       |                        |                                                                                                                                                                                                                |
| <b>Data item</b>                                                                  | <b>Definition</b>      | <b>Detailed definition</b>                                                                                                                                                                                     |
| Lung Cancer Nurse Specialist (LCNS)                                               | Contact made with LCNS | 0=no<br>1=Yes<br>999=Don't know                                                                                                                                                                                |
| <b>Treatment</b>                                                                  |                        |                                                                                                                                                                                                                |
| <b>Treatment intent</b><br>(reflects the intent of the treating physician or MDT) | Numerical code         | 1=curative intent<br>2=non-curative intent<br>3=no active treatment<br>999=don't know                                                                                                                          |
|                                                                                   | Curative               | This is single or multimodality treatment which is hoped will remove the threat of lung cancer on the patient's life expectancy.                                                                               |
|                                                                                   | Non-curative           | This is single or multimodality treatment which is expected to gain local control, or limit the progression of the disease, but unlikely to remove the threat of lung cancer on the patient's life expectancy. |
|                                                                                   | No active treatment    | This would be those patients who decline, or are too frail for, radiotherapy or chemotherapy and simply receive medication for symptom control or a watch and wait policy                                      |
| <b>First line treatment given to primary tumour</b>                               |                        |                                                                                                                                                                                                                |
|                                                                                   | Numerical code         | Choose <b>one option only</b> from list below.                                                                                                                                                                 |
|                                                                                   | 1                      | Surgery alone                                                                                                                                                                                                  |
|                                                                                   | 2                      | Hyperfractionated radiotherapy                                                                                                                                                                                 |
|                                                                                   | 3                      | External beam radiotherapy (curative intent but not CHART)                                                                                                                                                     |
|                                                                                   | 4                      | Stereotactic Radiotherapy                                                                                                                                                                                      |
|                                                                                   | 5                      | Radiofrequency/microwave ablation                                                                                                                                                                              |
|                                                                                   | 6                      | Brachytherapy                                                                                                                                                                                                  |
|                                                                                   | 7                      | Palliative radiotherapy to lung primary                                                                                                                                                                        |
|                                                                                   | 8                      | Concurrent chemo-radiotherapy                                                                                                                                                                                  |
|                                                                                   | 9                      | Sequential chemo-radiotherapy                                                                                                                                                                                  |
|                                                                                   | 10                     | Induction radiotherapy (pre surgery)                                                                                                                                                                           |
|                                                                                   | 11                     | Induction chemotherapy (pre surgery)                                                                                                                                                                           |
|                                                                                   | 12                     | Palliative Chemotherapy                                                                                                                                                                                        |
|                                                                                   | 13                     | Targeted/biological therapy (TKI etc)                                                                                                                                                                          |
|                                                                                   | 14                     | Immunotherapy                                                                                                                                                                                                  |
|                                                                                   | 15                     | Interventional bronchoscopy                                                                                                                                                                                    |
|                                                                                   | 16                     | Specialist palliative care                                                                                                                                                                                     |
|                                                                                   | 17                     | Other (free text)                                                                                                                                                                                              |
|                                                                                   | 999                    | Don't know/not recorded                                                                                                                                                                                        |
| <b>First line treatment not given or change in treatment plan</b>                 |                        | 0=Not relevant                                                                                                                                                                                                 |

|                                                                                            |                                          |                                                                                                                                                                                                                                      |
|--------------------------------------------------------------------------------------------|------------------------------------------|--------------------------------------------------------------------------------------------------------------------------------------------------------------------------------------------------------------------------------------|
|                                                                                            |                                          | 1=Patient declined 1 <sup>st</sup> line treatment offered<br>2=Patient deteriorated and no longer eligible for 1 <sup>st</sup> line treatment<br>3=Hospital unable to provide 1 <sup>st</sup> line treatment<br>4= other (free text) |
| <b>Date of 1<sup>st</sup> line treatment</b>                                               | dd/mm/yyyy                               | Date of the start of 1 <sup>st</sup> line treatment, ie date of operation, or first day of radiotherapy or chemotherapy regime, or appointment with specialist palliative care physician.                                            |
| <b>Type of operation</b><br>Additional question only if option 1 above                     | Numerical value                          | 0=incomplete resection (residual macroscopic disease evident)<br>1=segmentectomy<br>2=wedge resection<br>3=lobectomy<br>4=bi-lobectomy<br>5=sleeve lobectomy<br>6=pneumonectomy<br>999=don't know                                    |
| <b>Pathological stage</b><br>Additional question only if option 1 above                    | Staging system used                      | IASLC version 7 or 8                                                                                                                                                                                                                 |
|                                                                                            | Pathological stage                       | Based on version used can then have drop down menu for pathological stage                                                                                                                                                            |
| <b>Nature of radiotherapy</b><br>Additional questions only if options 2,3,4,7 or 10 chosen | Total dose given (Grey)                  | Absolute number.                                                                                                                                                                                                                     |
|                                                                                            | Number of fractions                      | Absolute number (eg 6)                                                                                                                                                                                                               |
|                                                                                            | Number of days or radiotherapy treatment | Absolute number (eg. 12)                                                                                                                                                                                                             |
| <b>Nature of chemotherapy</b><br>Additional question only if options 11 or 12 chosen       | Numerical value                          | 1=single agent chemotherapy<br>2= Doublet platinum-based chemotherapy<br>3=other (free text)<br>999=don't know                                                                                                                       |
| <b>Additional supportive 1<sup>st</sup> line treatment given?</b>                          |                                          |                                                                                                                                                                                                                                      |
|                                                                                            | Numerical value                          | 0=No<br>1=Yes<br>If yes then further question appears                                                                                                                                                                                |
| <b>Type of additional supportive 1<sup>st</sup> line treatment</b>                         |                                          |                                                                                                                                                                                                                                      |
|                                                                                            | Numerical value                          |                                                                                                                                                                                                                                      |
|                                                                                            | 1                                        | Stereotactic radiotherapy to brain metastases                                                                                                                                                                                        |
|                                                                                            | 2                                        | Radiotherapy for spinal cord compression                                                                                                                                                                                             |
|                                                                                            | 3                                        | Prophylactic Cranial Irradiation                                                                                                                                                                                                     |
|                                                                                            | 4                                        | Whole brain radiotherapy                                                                                                                                                                                                             |
|                                                                                            | 5                                        | Radiotherapy for oligometastases                                                                                                                                                                                                     |
|                                                                                            | 6                                        | SABR for oligometastases                                                                                                                                                                                                             |
|                                                                                            | 7                                        | Radiotherapy for SVCO                                                                                                                                                                                                                |
|                                                                                            | 8                                        | Radiotherapy to mediastinum                                                                                                                                                                                                          |
|                                                                                            | 9                                        | Specialist palliative care                                                                                                                                                                                                           |
|                                                                                            | 10                                       | Surgical resection of metastases                                                                                                                                                                                                     |



|                                                                      |                                                                                                                                                                 |                                                                                                                                                                                                                                                                 |
|----------------------------------------------------------------------|-----------------------------------------------------------------------------------------------------------------------------------------------------------------|-----------------------------------------------------------------------------------------------------------------------------------------------------------------------------------------------------------------------------------------------------------------|
|                                                                      | 11                                                                                                                                                              | Pleural intervention (see below)                                                                                                                                                                                                                                |
|                                                                      | 12                                                                                                                                                              | Other (free text)                                                                                                                                                                                                                                               |
| Date of first radiotherapy session                                   | dd/mm/yyyy                                                                                                                                                      |                                                                                                                                                                                                                                                                 |
| Nature of radiotherapy (1-8)                                         | Total dose given (Grey)                                                                                                                                         | Absolute number (e.g. 30)                                                                                                                                                                                                                                       |
|                                                                      | Number of fractions                                                                                                                                             | Absolute number (e.g. 6)                                                                                                                                                                                                                                        |
|                                                                      | Number of days or radiotherapy treatment                                                                                                                        | Absolute number (e.g. 12)                                                                                                                                                                                                                                       |
| Date of palliative care                                              | dd/mm/yyyy                                                                                                                                                      | Date of first appointment with specialist palliative care physician                                                                                                                                                                                             |
| Date of surgery                                                      | dd/mm/yyyy                                                                                                                                                      |                                                                                                                                                                                                                                                                 |
| Date of pleural intervention                                         | dd/mm/yyyy                                                                                                                                                      |                                                                                                                                                                                                                                                                 |
| Type of Pleural intervention                                         | Numerical value                                                                                                                                                 | 1=thoracocentesis<br>2=chest drain<br>3=pleurodesis<br>4=indwelling chest drain                                                                                                                                                                                 |
| How is the patient followed up after 1 <sup>st</sup> line treatment? | Numerical value, please pick single item from list. Options are ranked in descending order. If multiple answers apply, please pick the first answer in the list | 1=Regular out-patient visits with physician (member of MDT)<br>2=Follow up with lung cancer nurse specialist<br>3=Virtual follow-up after imaging<br>4=Phone contact with patient<br>5=Referred back to primary care doctor<br>0=No follow-up<br>999=don't know |
| Date of completion of 1 <sup>st</sup> line treatment                 | dd/mm/yyyy                                                                                                                                                      |                                                                                                                                                                                                                                                                 |
| Response to 1 <sup>st</sup> line treatment?                          | Numerical value                                                                                                                                                 | 0=Complete remission<br>1=Partial response<br>2=Stable disease<br>3=Progression<br>999=don't know                                                                                                                                                               |
| Date of relapse                                                      | dd/mm/yyyy                                                                                                                                                      |                                                                                                                                                                                                                                                                 |
| How was relapse detected?                                            |                                                                                                                                                                 | 0=Planned imaging<br>1=Symptoms<br>2=Incidental finding with unrelated problem<br>999=don't know                                                                                                                                                                |
| Subsequent treatment to lung primary                                 |                                                                                                                                                                 |                                                                                                                                                                                                                                                                 |
|                                                                      | Numerical code                                                                                                                                                  | <b>More than one</b> treatment option can be chosen during the patient treatment programme (please confirm with dates below)                                                                                                                                    |
|                                                                      | 1                                                                                                                                                               | Surgery                                                                                                                                                                                                                                                         |
|                                                                      | 2                                                                                                                                                               | Chemotherapy and radiotherapy in addition to surgery (tri-modality treatment)                                                                                                                                                                                   |
|                                                                      | 3                                                                                                                                                               | Hyperfractionated radiotherapy                                                                                                                                                                                                                                  |
|                                                                      | 4                                                                                                                                                               | External beam radiotherapy (curative intent but not CHART)                                                                                                                                                                                                      |
|                                                                      | 5                                                                                                                                                               | Stereotactic Radiotherapy (3-8 fractions)                                                                                                                                                                                                                       |
|                                                                      | 6                                                                                                                                                               | Radiofrequency/microwave ablation                                                                                                                                                                                                                               |
|                                                                      | 7                                                                                                                                                               | Brachytherapy                                                                                                                                                                                                                                                   |
|                                                                      | 8                                                                                                                                                               | Palliative radiotherapy to lung primary                                                                                                                                                                                                                         |
|                                                                      | 9                                                                                                                                                               | Concurrent chemo-radiotherapy                                                                                                                                                                                                                                   |

|                                            |                                          |                                                                     |
|--------------------------------------------|------------------------------------------|---------------------------------------------------------------------|
|                                            | 10                                       | Sequential chemo-radiotherapy                                       |
|                                            | 11                                       | Palliative Chemotherapy                                             |
|                                            | 12                                       | Targeted/biological therapy (TKI etc)                               |
|                                            | 13                                       | Immunotherapy                                                       |
|                                            | 14                                       | Interventional bronchoscopy                                         |
|                                            | 15                                       | Specialist palliative care                                          |
|                                            | 999                                      | Don't know/not recorded                                             |
| <b>Date of surgery</b>                     | dd/mm/yyyy                               |                                                                     |
| <b>Date of first radiotherapy session</b>  | dd/mm/yyyy                               |                                                                     |
| <b>Nature of radiotherapy</b>              | Total dose given (Grey)                  | Absolute number (e.g. 30)                                           |
|                                            | Number of fractions given                | Absolute number (e.g. 6)                                            |
|                                            | Number of days or radiotherapy treatment | Absolute number (e.g. 12)                                           |
| <b>Date first chemotherapy started</b>     | dd/mm/yyyy                               |                                                                     |
| <b>Date of last chemotherapy dose</b>      | dd/mm/yyyy                               |                                                                     |
| <b>Date of interventional bronchoscopy</b> | dd/mm/yyyy                               |                                                                     |
| <b>Date of specialist palliative care</b>  | dd/mm/yyyy                               | Date of first appointment with specialist palliative care physician |
| <b>Clinical trial</b>                      | Is the patient part of a clinical trial? | 0=No<br>1=Yes<br><br>999=Don't know                                 |
| <b>Date of death</b>                       | dd/mm/yyyy                               |                                                                     |

**Legend:** data items in black are mandatory within the proposed minimum dataset; those in blue are desirable dataset.

Dd/mm/yyyy; Date, month and year.
